BIOLOGICAL SCIENCES: Ecology; Psychological and Cognitive Sciences

2

**Reciprocity and behavioral heterogeneity govern the stability of social networks**

4

6 Roslyn Dakin<sup>1,2\*</sup> and T. Brandt Ryder<sup>1,3§</sup>

8 <sup>1</sup>Migratory Bird Center, Smithsonian Conservation Biology Institute, National Zoological Park, Washington, DC 20013, USA

10 <sup>2</sup>Department of Biology, Carleton University, Ottawa, ON, K1S 5B6, Canada

<sup>3</sup>Bird Conservancy of the Rockies, Fort Collins, Colorado, 80525, USA

12

Corresponding authors:

14 \* Roslyn Dakin, 613-981-1906, [roslyn.dakin@gmail.com](mailto:roslyn.dakin@gmail.com)

§ Brandt Ryder, 202-633-4181, [rydert@si.edu](mailto:rydert@si.edu)

16 **Abstract**

18 The dynamics of social networks can determine the transmission of information, the spread of  
20 diseases, and the evolution of behavior. Despite this broad importance, a general framework for  
22 predicting social network stability has not been proposed. Here, we present longitudinal data on  
24 the social dynamics of a cooperative bird species, the wire-tailed manakin, to evaluate the  
26 potential causes of temporal network stability. We find that when partners interact less  
28 frequently, and when the breadth of social connectedness within the network increases, the social  
30 network is subsequently less stable. Social connectivity was also negatively associated with the  
32 temporal persistence of coalition partnerships on an annual timescale. This negative association  
34 between connectivity and stability was surprising, especially given that individual manakins who  
were more connected also had more stable partnerships. This apparent paradox arises from a  
within-individual behavioral trade-off between partnership quantity and quality. Crucially, this  
trade-off is easily masked by behavioral variation among individuals. Using a simulation, we  
show that these results are explained by a simple model that combines among-individual  
behavioral heterogeneity and reciprocity within the network. As social networks become more  
connected, individuals face a trade-off between partnership quantity and maintenance. This  
model also demonstrates how among-individual behavioral heterogeneity, a ubiquitous feature of  
natural societies, can improve social stability. Together, these findings provide unifying  
principles that are expected to govern diverse social systems.

36 **Significance Statement**

38 In animal societies, social partnerships form a dynamic network that can change over time. Why  
40 are some social network structures more stable than others? We addressed this question by  
42 studying a cooperative bird species in which social behavior is important for fitness, similar to  
44 humans. We found that stable social networks are characterized by more frequent interactions,  
but sparser connectivity throughout the network. Using a simulation, we show how both results  
can be explained by a simple model of reciprocity. These findings indicate that social stability is  
governed by a trade-off whereby individuals can either maintain a few high-quality partners, or  
increase partner number. This fundamental trade-off may govern the dynamics and stability of  
many societies, including in humans.

46 Social network structure – or, the way individuals are linked by repeated social interactions – can  
48 influence the transmission of information, culture, resources, and diseases (1–6). Recent work  
50 has begun to demonstrate how changes to social network topology can have diverse costs (2, 7–  
52 10) and benefits (11–13), and may even influence the evolution of behavior (14). Although  
54 previous research has explored how social relationships form, and why some relationships are  
maintained for longer time periods than others (15–19), we lack a general framework to link  
individual behaviors with temporal dynamics of the social network at a collective level (20, 21).  
A mechanistic understanding of these processes is essential to explain the diversity of social  
systems, predict the downstream fate of social interactions, and engineer societies.

Here, we combine repeated measures of social structure and mechanistic models to  
elucidate the drivers of temporal dynamics in a cooperative system. Our empirical approach was  
based on automated biologging of a neotropical bird species, the wire-tailed manakin *Pipra*  
*filicauda*. Cooperative partnerships are a key part of the manakin social system (5, 22, 23),  
similar to humans (24). Male wire-tailed manakins cooperate by forming display coalitions  
which are the basis of dynamic social networks (25, 26). Cooperation occurs on display  
territories that are clustered into spatial aggregations called leks. A lek typically has between 4-  
14 display territories, and about twice as many males that visit the lek (each of whom limits his  
interactions to particular coalition partners (27)). The male-male coalitions that form at the  
manakin lek territories are a prerequisite for an individual to attain territory ownership, and  
ultimately, sire offspring (22, 23). To quantify cooperative partnerships and social network  
dynamics, we used an automated tracking system that identified times when two males co-  
occurred on a lek display territory as an indication of social interaction events (25, 26).

By tracking a population of 180 male manakins and 36,885 social interactions over three  
years, we took repeated measures of 11 leks to characterize the temporal dynamics of the social  
network at each site (on average, repeated measures of the same lek were 21 days apart; IQR 17-  
24). To analyze the dynamics of network topology from time  $t_1$  to  $t_2$ , we define the stability of a  
binary network as the number of male-male partnerships (network edges) shared by both time  
points divided by the number of partnerships at either time point (i.e., the intersection divided by  
the union; Fig. 1a). To avoid bias as a result of rare events, we filtered the manakin data to  
include only significant partnerships in the computation of stability (see Methods for details).  
Using this metric of stability, we found that the manakin social networks were more stable than  
expected by chance (Fig. 1a), similar to other social animals (7, 28–30). However, stability was  
not constant, because each network fluctuated across a range of values (mean stability  $0.43 \pm$  SD  
 $0.23$ ; repeatability of stability 0, 95% CI 0–0.22).

To test how the social structure at  $t_1$  might predict subsequent network stability, we used  
a mixed-effects modelling framework. We found that three properties of the social network could  
explain 28% of the variation in stability in the best-fit model: network size (the number of  
individuals or nodes in the network), network weight (the average frequency of social  
interactions), and network density (the proportion of possible partnerships that actually occurred,  
which is a measure of connectivity; Fig. 1b–d). Note that network size, weight, and density were  
all determined using unfiltered weighted networks (see Methods for details). The analysis also  
accounted for the timing (year and mean Julian date) when each sample of a network was taken.  
All else being equal, when partners within the network interacted more often (higher network  
weight), and when there were relatively fewer partnerships in the network (lower network  
density), the social structure was more stable over the subsequent weeks (Fig. 2).

92 The negative association between network density and stability was unexpected, given  
that connectedness in a cooperative system without defection is thought to foster social cohesion  
(31). To provide a mechanistic explanation for this result, we built a simulation model based on  
94 the hypothesis that individual behaviors would drive emergent properties of the system (32, 33).  
In this model, the individuals iteratively sought partnerships with each other at each time step.  
96 The model assumed three simple rules that describe a scenario of reciprocity (24) with among-  
individual heterogeneity (32, 34): (i) social partnerships are formed through reciprocal partner  
98 choice, wherein both individuals must choose each other; (ii) individuals prefer social partners  
with whom they have previously interacted (35); and (iii) there are consistent among-individual  
100 differences in the expression of social behaviour. This third assumption of among-individual  
behavioral heterogeneity is ubiquitous in human and animal behavior (34) and has been shown to  
102 influence collective performance (36) and the evolution of cooperation (37, 38). It is important to  
note that our simulation model made no assumptions as to the source of this among-individual  
104 heterogeneity (which could be caused by genetic, environmental, age-related, or other factors).  
We ran this simulation on 3,000 initial networks that were generated *de novo* to represent a broad  
106 range of network sizes, weights, and densities, and we used these initial networks to  
parameterize (ii) and (iii). We then allowed the individual nodes to repeatedly interact with each  
108 other. Finally, we computed the stability of each simulation run, by comparing the initial  
structure to the one that resulted from the newly simulated interactions.

110 Similar to the manakin data, we found that networks with a relatively high frequency of  
cooperation (high weight) but sparse connectivity (low density) were more stable (Fig. 2).  
112 Hence, the simple model of reciprocity plus heterogeneity was sufficient to recreate the  
dynamics observed in the empirical networks. Moreover, we found that the null model  
114 simulations that lacked all three assumptions (i–iii), or that included only (i), (ii), or (iii) alone,  
were insufficient to generate the empirical patterns of stability. In null models that lacked  
116 reciprocity, denser networks were also consistently more stable, making the negative effect  
observed in the empirical data particularly striking (Fig. 2b). Overall, our findings indicate that  
118 both behavioral processes, reciprocity and heterogeneity, are necessary to recreate the weight and  
density effects on network stability. Finally, we found that the larger simulated networks with  
120 more individuals were also significantly less stable, independent of network weight and density.  
This effect of network size was also consistent with the manakin data (although in the empirical  
122 analysis, it was not quite statistically significant; Table S3).

124 Why are some social partnerships able to persist through time (7, 18, 29, 30)? To  
understand how social structure might influence the fidelity of particular bonds over longer  
126 timescales, we analyzed the annual persistence of 669 manakin partnerships from one season to  
the next (Fig. 3a–b). In this analysis, a partnership was defined as two males who interacted on a  
display territory at least once in a given season. Annual persistence was defined as that  
128 partnership recurring at a significant rate the following year (see Methods for details). The  
analysis accounted for the identities of the partners, the year, the lek where the partnership  
130 occurred, and other factors including the spatial overlap of the individuals. Two features  
predominantly explained the variation in partnership persistence: the interaction frequency (edge  
132 weight), and the local social density (edge connectivity, which quantifies the number of  
alternative paths that can connect two partners in a social network). Specifically, a partnership  
134 was more likely to persist if the two individuals interacted more frequently, but had lower  
connectivity in their social neighborhood. These results are consistent with the phenomena  
136 observed at the network level over shorter weekly timescales (Fig. 2). Moreover, we found that

138 the simulation of reciprocity and heterogeneity could also recreate the empirical results found for  
partnership persistence (Fig. 3c–d).

140 These negative effects of overall network connectivity suggest that social stability is  
governed by a fundamental trade-off between the quantity and quality of social partnerships.  
142 Contrary to the trade-off hypothesis, however, the manakins with more partners (i.e., those with  
higher average degree centrality) formed coalitions that were more likely to persist through time  
(Fig. 4a). This apparent paradox is resolved by partitioning the variation among- and within-  
144 individuals (Fig. 4b-c). Among individuals, the males who were more connected were better able  
to maintain their partnerships (Fig. 4b). However, when a given male had more partners than his  
146 average, he was less able to maintain them (Fig. 4c). Thus, each individual may have a different  
threshold for the number of stable coalition partnerships he is able to maintain. This explains  
148 why densely connected social networks are less stable (Fig. 2), even though well-connected  
individuals are better at maintaining partnerships (Fig. 4a-b). In wire-tailed manakins, the  
150 proximate causes of this among-individual heterogeneity are not yet well understood (39), but  
could include a male's quality, age and social experience, and/or his compatibility with the other  
152 males on his lek.

How might the magnitude of behavioral heterogeneity influence the stability of  
154 cooperative networks (36)? Our simulation model provided an opportunity to begin exploring  
this question. To measure heterogeneity, we computed the coefficient of variation in degree  
156 centrality ( $CV_{\text{degree}}$ ) in each of the initial networks; higher values indicate greater behavioral  
heterogeneity in the system (40). We found that  $CV_{\text{degree}}$  had a significant positive effect on  
158 subsequent network stability (Fig. 4d), demonstrating that individual variation in sociality can  
foster stable social networks. This is similar to the way some ecological systems are affected by  
160 heterogeneity (e.g., CV of connectedness (degree) and edge weights) (40, 41). In social systems,  
behavioral heterogeneity can also include suites of correlated traits such as dispersal, risk-taking,  
162 and cognitive ability, in addition to variation in sociality (20, 34, 42). Further study is needed to  
understand how this covariation influences social network stability and the evolution of complex  
164 social behavior (33).

In summary, we find that social interactions can have opposing effects on the stability of  
166 cooperative systems. On the one hand, the stability of the social network is enhanced by  
increasing the interaction frequency among a small number of partnerships. However, when  
168 individuals become too broadly connected, the social network can be destabilized. This is  
because individuals are constrained in their ability to reciprocate a large number of social  
170 partnerships. Our results also highlight the fact that among-individual heterogeneity can easily  
mask this behavioral trade-off (34). Hence, these results emphasize the importance of  
172 longitudinal data that captures multilevel variation, within- and among-individuals.

Can these principles be applied to other systems? Although social network stability has  
174 not yet been analyzed in humans at a broad scale, this is an important next step, given that  
globalization and social media use have rapidly increased the breadth of human social  
176 connectivity (6, 43). Our model provides one potential explanation for how these novel  
behavioral interaction patterns could have a destabilizing effect on human social structure.  
178 Another important question is how much topological changes in these networks affect other  
dynamics, such as the spread of emotions, cultural evolution, and disease transmission. Although  
180 our study focused on one type of cooperative system, many other social networks are formed as a  
result of competitive, aggressive, mating, and information-sharing interactions (20). As a  
182 unifying framework, we propose that social stability in these other contexts will also be

184 determined by the simple behavioral processes that generate heterogeneity, partner preferences,  
and the symmetry of partner choice.

## 186 MATERIALS AND METHODS

### 188 Field methods

190 Observed social networks were based on a study of wire-tailed manakins, *Pipra filicauda*, at the  
Tiputini Biodiversity Station in Ecuador (0° 38' S, 76° 08' W, 200 m elevation). Male wire-tailed  
192 manakins perform cooperative courtship displays at exploded leks, where males are in acoustic  
but not visual contact (44). The population at Tiputini has been monitored since 2002 to study  
the fitness benefits of cooperative behavior (22, 23). The present study spanned three field  
194 seasons (December-March) in 2015-16, 2016-17 and 2017-18, and used an automated proximity  
data-logging system to record cooperative interactions among males (25, 26). Manakins were  
196 captured using mist-nets and each male was outfitted with unique color bands and a coded nano-  
tag transmitter (NTQB-2, Lotek Wireless; 0.35 g). To record the social network at a given lek,  
198 proximity data-loggers (SRX-DL800, Lotek Wireless) were deployed in each territory to record  
all tag detections within the territory from 06:00 to 16:00 for ~6 consecutive days ( $\pm$  SD 1 day),  
200 which comprised a single recording session (26, 39). Territory ownership was assigned using  
direct observation of color-banded males at the display sites (22), and was subsequently verified  
202 in the proximity data. Sample sizes were not predetermined because our aim was to track all  
individuals within the studied leks (39). In the absence of a formal mark-recapture protocol, we  
204 examined the percentage of territory-holders tagged as an indication of how well our sample  
covered the known population (95%, 95%, and 92%, for the three respective field seasons). All  
206 animal research was approved by the Smithsonian ACUC (protocols #12-23, 14-25, and 17-11)  
and the Ecuadorean Ministry of the Environment (MAE-DNB-CM-2015-0008).

208

### Data processing

210 All data processing and statistical analyses were performed in R 3.5.1 (45). Male-male  
cooperative interactions on the display territories were determined using spatiotemporal overlap  
212 of tag detections in the proximity data (26). Specifically, a social interaction was defined as a  
joint detection of two males within approximately 5 m on a territory during the breeding season  
214 (26). This spatial range corresponds to the visual and acoustic contact required for a typical  
display interaction in this species (22, 46). Because the social interactions were measured using  
216 an automated system, the networks were constructed blind to the sociality of particular  
individuals and/or leks. A previous validation study conducted in 2012 (25) confirmed that the  
218 social interactions defined by this automated system corresponded to direct observations of male-  
male display partnerships. We used the social interaction data to build undirected weighted social  
220 networks for each lek recording session, with each node representing a male, and the edges  
weighted by the frequency of social interactions summed over a recording session (approx. 6  
222 days, defined above). In total, we characterized 86 repeated measures of the social networks at  
11 leks (mean 7.8 sessions per lek,  $\pm$  SD 3.7) from 29,760 sampling session hours and 36,885  
224 unique social interactions among 180 individuals. We used a clustering analyses in the igraph  
package (47, 48) to verify that our sampling design was well-matched to the inherent social  
226 structure of the population (Fig. S1).

228

## Network stability

230 The stability of social network topology is determined by both the gain and loss of associations  
231 over time. We therefore defined a bidirectional metric of social network stability for binary  
232 (unweighted) networks that compares two repeated measurements of the network,  $N$ , at times  $t_1$   
233 and  $t_2$ . The stability of  $N$  over the period  $t_1 \leftrightarrow t_2$  is defined as the number of social partnerships  
234 (i.e., edges) shared by  $N_1$  and  $N_2$  (i.e., intersection  $\cap$ ), divided by the total number of unique  
235 edge connections in either  $N_1$  or  $N_2$  (i.e., union  $\cup$ ). Using  $E$  to represent network edges, stability  
236 is thus defined by the following formula:

$$\text{Stability} = \frac{(E_1 \cap E_2)}{(E_1 \cup E_2)}$$

237 This metric can range from 0 (unstable) to 1 (highly stable). Note that this definition would not  
238 apply to complete (fully connected) networks. In most social networks, individuals (or nodes)  
239 can also be gained or lost over time, which alters the set of possible interactions that could occur.  
240 To ensure that our measure of social network stability was based on edges that could have  
241 occurred at both time points, only individuals who were present at both  $t_1$  and  $t_2$  were included in  
242 the calculation (49). Therefore, this definition captures the stability of relationships among  
243 individuals who remained in the network over two consecutive time steps (49). Furthermore, to  
244 ensure that the stability metric was not biased by rare interactions (50), we also filtered the  
245 stability calculation to be based on binary networks that included only edges that met two criteria  
246 in the empirical data: (1) a significant edge had to occur more often than its own average  
247 occurrence in 1,000 random permutations of the interaction data, and (2) it had to occur at least  
248 six times during the recording session (i.e., on average, about once per day). The second criterion  
249 ensured that rare interactions were not easily deemed significant. The value of six was chosen to  
250 correspond to the average number of days in each recording sessions, but we also verified that  
251 other thresholds  $>2$  did not influence our results. Finally, we verified that all of the results were  
252 also unchanged when using only the second (absolute) criterion.

253 The average stability score for the manakin networks was  $0.43 (\pm \text{SD } 0.23, n = 60$   
254 networks at 11 leks). Note that the sample size of 60 is smaller than the total number of  
255 recording sessions, because the stability dataset is limited to networks that were also sampled at  
256  $t_2$  within the same season. The observed networks were also more stable than expected by chance  
257 (paired t-test,  $t = 12.08, p < 0.0001$ ), as determined by random network rewiring (100 edge  
258 permutations for each of the 60 measurements; grand mean null expected stability  $0.07 \pm \text{SD}$   
259  $0.05$ ).

## Network-level analyses

260 Network size, connectivity, and structure can all influence the dynamics and stability of diverse  
261 network types (40, 41). Therefore, to determine how network-level properties at  $t_1$  predict  
262 subsequent social network stability, we fit mixed-effects regression models using the package  
263 lme4 (51) ( $n = 60$  networks at 11 leks). The analysis included lek identity as a random effect, and  
264 to account for potential temporal trends, we also included field season (categorical) and mean  
265 Julian date of the network (continuous) as two fixed effects. Mean Julian date for a network was  
266 calculated as the average date of all of the social interactions that occurred within that network.  
267 We considered five network properties that have been shown to influence network dynamics in  
268 other contexts (40, 41) as additional fixed effects: (1) network weight is a measure of the average  
269 relationship frequency, calculated as the mean of the log-transformed edge weights; (2) network  
270 density is a measure of the breadth of connectivity, calculated as the proportion of relationships  
271

274 that actually occurred relative to a completely connected network; (3) clustering coefficient, or  
network transitivity, is an alternative measure of connectivity that is often important in social  
276 networks (52), and that describes the probability that a given individual/node's social partners  
are also connected; and (4) network modularity is yet another measure of connectivity that  
278 describes how well the network can be subdivided into separate communities using the random-  
walk algorithm (47, 48). To account for the fact that these network-level properties often scale  
280 with network size (32, 53) (Fig. 1e–g), we also included (5) the log-transformed number of  
individuals/nodes in the social network as an additional predictor. Note that unlike the  
282 calculation of network stability in the previous section, all five of these network properties were  
computed from unfiltered network data.

Because density, transitivity, and modularity were all similar measures of network  
284 connectivity, and because the sample size of 60 is not enough to reasonably estimate more than  
five or six fixed effects at a time, we used a model selection procedure to compare candidate  
286 models that included field season, date, network size, and at most two of the other network  
properties. Given that network weight, density, and clustering coefficient were all correlated  
288 measures of connectivity, each model could include at most one of the those parameters. We also  
considered a null model that included none of (1)-(4). Complete details are provided in Tables  
290 S1-S2. Finally, we evaluated whether network stability was influenced by two logistical factors:  
first, sampling effort, and second, a testosterone manipulation experiment that was conducted for  
292 a separate study in 2016-17 and 2017-18 ( $n = 9$  individuals out of 180 that were implanted with  
testosterone (39)). To verify that these two logistical factors did not influence our results, we  
294 added additional fixed effects for the number of recording hours (median 75, mean  $73 \pm \text{SD } 10$ )  
and/or the number of hormone-manipulated individuals in a given network (median 0, mean  $0.10$   
296  $\pm \text{SD } 0.41$ ), neither of which had a significant effect on network stability (all  $p > 0.43$ ). We also  
verified that all of the conclusions of the network-level analysis were unchanged when  
298 accounting for either or both of these covariates. To determine the repeatability of network  
properties of the leks, we calculated the proportion of total variation that was due to differences  
300 among the leks using mixed-effects models with lek as the random effect and field season and  
Julian date as fixed effects (51, 54).

302

### Edge-level analysis

304 The edge-level analysis examined the persistence of manakin social partnerships on an annual  
timescale. This analysis considered 669 dyadic partnerships among 91 individuals wherein both  
306 individuals in the partnership were also present and tagged in the subsequent breeding season. A  
partnership was defined as two males who had interacted on a display territory at least once. The  
308 binary response variable, partnership persistence, was defined as whether a partnership was  
sustained and significant in the subsequent breeding season (using the criteria for significance  
310 defined above in the section "Network stability"). Because both individuals in a social  
partnership can contribute to its fate, and because they both had other partnerships in the dataset,  
312 we modelled persistence using a multiple-membership structure in a binomial mixed-effects  
regression model, fit with the brms package (55). This method can be used to account for  
314 multiple partner identities within a single random effect (26, 55–57). In our analysis, the two  
identities were weighted equally, because we assumed they could both determine partnership  
316 persistence. An additional random effect was included to account for the lek where each  
partnership occurred. The analysis also included fixed effects to account for the initial field  
318 season (categorical), the territorial status of the pair (categorical; either two territory-holders, a



territory holder plus a floater, or two floaters (22)), the sampling effort at that lek in both the  
320 initial and the subsequent field season, and the initial spatial overlap of the pair, which can  
influence the probability of interaction (29). Because manakins use discrete display territories,  
322 we defined the spatial overlap of two males as the log-inverse of the chi-squared statistic  
comparing their distributions of territory detections (pings) in the proximity data; larger values of  
324 this metric indicate greater spatial overlap.

Based on the results of the network-level analysis, we sought to test whether edge-level  
326 network properties would predict partnership persistence. Thus, we also included the following  
fixed effects: (1) edge weight, or the log-transformed social interaction frequency; (2) edge  
328 betweenness, a measure of social centrality, defined as the log-transformed number of shortest  
paths passing through that edge; and (3) edge connectivity, a measure of social density, defined  
330 as the minimum number of edges that must be removed to eliminate all paths between the two  
individuals/nodes in a partnership (48). Edge weight and edge connectivity also correspond to  
332 the metrics of network weight and density, respectively, at the network level. In contrast, edge  
betweenness captures a different property: a relationship with a high edge betweenness is one  
334 that links individuals from two disparate communities. If partnership maintenance is enhanced  
when both individuals have strong links to the same local community, we expect a negative  
336 relationship between edge betweenness and persistence. Alternatively, if individuals place  
particular value on long-range ties, partnership persistence might be positively related to  
338 betweenness. We ran four independently seeded chains with default priors, storing 2,000 samples  
from each chain, and verifying that the convergence statistics were all equal to one (55) (Table  
340 S4).

### 342 **Among-individual analysis**

To test whether partnership persistence could be attributed to behavioral differences among  
344 individual manakins, we refit the analysis described above, but without accounting for (1)-(3)  
listed above. The random intercepts from this model provide an estimate of among-individual  
346 variation in social stability (26, 54). We hypothesized that the following behavioral phenotypes  
(26) could affect this trait: (1) a male's average daily effort, measured using his log-transformed  
348 count of detections (pings) on the leks; (2) his average daily strength, using his log-transformed  
sum of interaction frequencies; (3) his average daily degree, using his log-transformed number of  
350 social partnerships, and (4) and his average daily social importance, defined as the exclusivity of  
his partnerships (see the previous protocol (26) for additional details). Because these four  
352 phenotypes were also correlated (26, 39), we compared six candidate regression models, four of  
which included only one behavioral phenotype, one of which included all four phenotypes, and  
354 one of which included no behavioral phenotypes ( $n = 91$  individuals; see Table S5). All  
candidate models included a male's status as either a territory-holder or floater.

### 356 **Quantity-quality trade-off analysis**

358 We next sought to test the hypothesis that individuals in a network face a trade-off between the  
quantity (number of partners) and stability of their social partnerships. Because among-  
360 individual variance can mask trade-offs that occur within-individuals (58), testing this hypothesis  
requires a variance-partitioning approach. To achieve this, we defined repeated measures of  
362 individual partnership maintenance as the proportion of a male's coalition partners that were  
maintained from a given recording session to the next recording session ( $n = 565$  repeated  
364 measures of 152 individuals). Similar to our other analyses, a partnership was defined as two

366 males having at least one interaction during a recording session. Note that a male had to be  
367 present, tagged, detected, and not part of the hormone manipulation experiment in both the initial  
368 and subsequent recording sessions to be included in this sample. We used within-group centering  
369 to partition the variation in the predictor variable, degree centrality, within- and among-  
370 individuals (59). The first step was to determine log-transformed degree for each male in each  
371 recording session; next, we took a single average degree value per male; and finally, we  
372 calculated relative degree in each recording session as a male's log-transformed degree minus his  
373 overall average. Thus, average and relative degree represent two orthogonal predictors that can  
374 be analyzed within the same regression model. The analysis was fit as a binomial mixed-effects  
375 model in lme4 (51) with a random effect of individual identity, and it also included two  
376 categorical fixed effects to account for field season and territorial status, respectively, as well as  
377 a continuous fixed effect to account for sampling effort (Table S6).

378 To evaluate what would be expected in this analysis by chance alone, we repeated the  
379 analysis using randomly permuted networks. To do this, we used permutations of the manakin  
380 data wherein each lek social network was randomly rewired between each recording session  
381 (48). We generated 1,000 of these randomized datasets and then performed the same repeated-  
382 measures analysis that was applied to the observed data. We averaged the results across all 1,000  
383 randomized analyses to derive the null expectation shown in Fig. S2.

#### 384 **Individual-based simulation models**

385 To provide a mechanistic explanation for how individual behavior scales up to influence social  
386 network stability, we developed a simple individual-based simulation model. The model was  
387 based on the general principles of social reciprocity (24) and among-individual behavioral  
388 heterogeneity. There were three core assumptions: (i) individuals had to actively choose each  
389 other in order to form a partnership; (ii) each individual had a ranked set of preferences for social  
390 partners, predicted only by its previous social interaction frequencies in the initial network, and  
391 (iii) individuals expressed consistent differences in their social behavior (referred to as  
392 behavioral phenotype). The second rule (ii) is supported by strong evidence that social  
393 relationships are non-random and persist over long time-scales in human and nonhuman animals  
394 (7, 29). Together, rules (i) and (ii) also represent a form of reciprocal altruism (24), because prior  
395 interactions increase the probability that a partner will be re-chosen. Rule (iii) represents a  
396 phenomenon that is often referred to as among-individual variation, heterogeneity, or  
397 personality; it has empirical support across vertebrates (34), including in manakins (26).

398 To experimentally test the effects of network size, weight, and density on network  
399 stability, we generated 3,000 initial networks with diverse properties that were within the range  
400 of the observed data. Network size was first chosen from the range of 11-20 individuals or nodes  
401 (10 size bins). To manipulate network density along the same range observed in the manakin  
402 data, we first generated completely connected networks, and then randomly removed edges until  
403 a target initial density was achieved (targets ranging from 0.2-0.8, for a total of 20 target density  
404 bins). To generate a broad range of initial network weights, each edge weight was first sampled  
405 from the manakin data, and then multiplied by a weight constant ranging from 0.2-2.0 (15 weight  
406 factor bins). The resulting edge weights were then rounded up, to a maximum of 500. We  
407 generated 3,000 networks with all possible combinations of these network properties (10 x 15 x  
408 20 = 3,000).

409 The simulation proceeded as follows. First, to satisfy rule (ii), we assigned a set of  
410 preferences to each node based on that node's partnerships in the initial starting network. The set

of preferences included all other nodes, ranked by interaction frequency with the focal node in the initial network. Hence, the probability of choice was correlated with initial interaction frequency. To satisfy rule (iii), each node was also allotted a specific number of interaction attempts per time step (ranging from 1-4). This number was calculated by log-transforming the strength of the focal node in the initial network (also referred to as weighted degree) to obtain its behavioral phenotype; higher values meant that a node could attempt more social interactions per unit time. To satisfy rule (i), a partnership was only formed if both nodes chose each other within a given time step. The simulation ran over five time steps and the final network was determined by summing the new interactions that occurred (Fig. S3). No filtering was applied to calculate network stability in the simulation. Note that for simplicity, the preference ranks for (ii) were not updated during the time steps that occurred within the simulation.

For the null model, we followed the same procedures above, except that each individual's partner choice probabilities were assigned randomly to the set of all other nodes, the number of attempted interactions per time step was fixed across individuals, and reciprocal partner choice was not required for partnership formation in the null model (i.e., assumptions ii, iii, and i were removed). We also tested models with either (i), (ii), or (iii) alone. After running the simulations, we used linear models to statistically analyze the variation in network stability and examine the three predictors of interest from Table S2: network size, weight, and density. To compare the results of this analysis with the statistical estimates derived from the observed data, all predictors and response variables were standardized to have a mean of 0 and SD of 1 (Table S3). To test whether the simulation model of reciprocity and heterogeneity could also explain our edge-level analysis, we used a binomial mixed-effects regression of edge persistence in the simulation, with the identity of the initial network as a random effect, and edge weight and edge connectivity as the predictors.

We chose five as the number of time steps in these simulations to correspond to a period of about five days of behavioral activity. To verify that the results of the simulation model would be robust to alternative time parameters, we also repeated these analyses using simulations with either three or ten time steps instead. In each case, we reached the same conclusions with nearly identical effect sizes for network size, weight, and density, respectively (Table S3).

### Data deposition

The data and R code necessary to reproduce our results are available at: <https://figshare.com/s/470aeac186a9dab72860>

### Acknowledgements

We thank Ben Vernasco, Camilo Alfonso, Brent Horton, Ignacio Moore, Brian Evans, David and Consuelo Romo, Kelly Swing, Diego Mosquera, Gabriela Vinueza, the Tiputini Biodiversity Station of the Universidad San Francisco de Quito, Julie Morand-Ferron, Jean-Guy Godin, and three anonymous reviewers. Funding was provided by National Science Foundation (NSF) IOS 1353085 and the Smithsonian Migratory Bird Center.

### References

1. D. J. Watts, S. H. Strogatz, Collective dynamics of 'small-world' networks. *Nature* **393**, 440 (1998).

- 456 2. J. C. Flack, M. Girvan, F. B. M. de Waal, D. C. Krakauer, Policing stabilizes construction of  
social niches in primates. *Nature* **439**, 426 (2006).
- 458 3. Aplin L. M., Farine D. R., Morand-Ferron J., Sheldon B. C., Social networks predict patch  
460 discovery in a wild population of songbirds. *Proc. R. Soc. B Biol. Sci.* **279**, 4199–4205  
(2012).
- 462 4. J. R. Hoyt, *et al.*, Cryptic connections illuminate pathogen transmission within community  
networks. *Nature* **563**, 710 (2018).
- 464 5. D. B. McDonald, Predicting fate from early connectivity in a social network. *Proc. Natl.  
Acad. Sci.* **104**, 10910–10914 (2007).
- 466 6. N. A. Christakis, J. H. Fowler, *Connected: The surprising power of our social networks and  
how they shape our lives.* (Little, Brown and Company, 2009).
- 468 7. J. B. Silk, *et al.*, Strong and consistent social bonds enhance the longevity of female baboons.  
*Curr. Biol.* **20**, 1359–1361 (2010).
- 470 8. K. L. Laskowski, P.-O. Montiglio, J. N. Pruitt, Individual and group performance suffers  
from social niche disruption. *Am. Nat.* **187**, 776–785 (2016).
- 472 9. L. J. N. Brent, A. Ruiz-Lambides, M. L. Platt, Family network size and survival across the  
lifespan of female macaques. *Proc. R. Soc. B Biol. Sci.* **284**, 20170515 (2017).
- 474 10. A. A. Maldonado-Chaparro, G. Alarcón-Nieto, J. A. Klarevas-Irby, D. R. Farine,  
Experimental disturbances reveal group-level costs of social instability. *Proc. R. Soc. B  
Biol. Sci.* **285**, 20181577 (2018).
- 476 11. K. FehI, D. J. van der Post, D. Semmann, Co-evolution of behaviour and social network  
structure promotes human cooperation. *Ecol. Lett.* **14**, 546–551 (2011).
- 478 12. D. G. Rand, S. Arbesman, N. A. Christakis, Dynamic social networks promote cooperation  
in experiments with humans. *Proc. Natl. Acad. Sci.* **108**, 19193–19198 (2011).
- 480 13. N. Stroeymeyt, *et al.*, Social network plasticity decreases disease transmission in a eusocial  
insect. *Science* **362**, 941–945 (2018).
- 482 14. H. Ohtsuki, C. Hauert, E. Lieberman, M. A. Nowak, A simple rule for the evolution of  
cooperation on graphs and social networks. *Nature* **441**, 502–505 (2006).
- 484 15. T. J. Berndt, The features and effects of friendship in early adolescence. *Child Dev.* **53**,  
1447–1460 (1982).
- 486 16. J. F. Benenson, A. Christakos, The greater fragility of females' versus males' closest same-  
sex friendships. *Child Dev.* **74**, 1123–1129 (2003).

- 488 17. A. Bowker, Predicting friendship stability during early adolescence. *J. Early Adolesc.* **24**,  
85–112 (2004).
- 490 18. J. B. Silk, S. C. Alberts, J. Altmann, Social relationships among adult female baboons (*Papio*  
*cynocephalus*) II. Variation in the quality and stability of social bonds. *Behav. Ecol.*  
492 *Sociobiol.* **61**, 197–204 (2006).
- 494 19. B. A. Beisner, M. E. Jackson, A. N. Cameron, B. McCowan, Detecting instability in animal  
social networks: genetic fragmentation is associated with social instability in rhesus  
macaques. *PLOS ONE* **6**, e16365 (2011).
- 496 20. A. Sih, S. F. Hanser, K. A. McHugh, Social network theory: new insights and issues for  
behavioral ecologists. *Behav. Ecol. Sociobiol.* **63**, 975–988 (2009).
- 498 21. N. Pinter-Wollman, *et al.*, The dynamics of animal social networks: analytical, conceptual,  
and theoretical advances. *Behav. Ecol.* **25**, 242–255 (2014).
- 500 22. T. B. Ryder, D. B. McDonald, J. G. Blake, P. G. Parker, B. A. Loiselle, Social networks in  
the lek-mating wire-tailed manakin (*Pipra filicauda*). *Proc. R. Soc. B* **275**, 1367–1374  
502 (2008).
- 504 23. T. B. Ryder, P. G. Parker, J. G. Blake, B. A. Loiselle, It takes two to tango: reproductive  
skew and social correlates of male mating success in a lek-breeding bird. *Proc. R. Soc. B*  
**276**, 2377–2384 (2009).
- 506 24. R. L. Trivers, The evolution of reciprocal altruism. *Q. Rev. Biol.* **46**, 35–57 (1971).
- 508 25. T. B. Ryder, B. M. Horton, M. van den Tillaart, J. D. D. Morales, I. T. Moore, Proximity  
data-loggers increase the quantity and quality of social network data. *Biol. Lett.* **8**, 917–920  
(2012).
- 510 26. R. Dakin, T. B. Ryder, Dynamic network partnerships and social contagion drive  
cooperation. *Proc. R. Soc. B Biol. Sci.* **285**, 20181973 (2018).
- 512 27. T. B. Ryder, J. G. Blake, P. G. Parker, B. A. Loiselle, The composition, stability, and kinship  
of reproductive coalitions in a lekking bird. *Behav. Ecol.* **22**, 282–290 (2011).
- 514 28. R. W. Baird, H. Whitehead, Social organization of mammal-eating killer whales: group  
stability and dispersal patterns. *Can. J. Zool.* **78**, 2096–2105 (2000).
- 516 29. D. Shizuka, *et al.*, Across-year social stability shapes network structure in wintering migrant  
sparrows. *Ecol. Lett.* **17**, 998–1007 (2014).
- 518 30. C. R. Stanley, C. Mettke-Hofmann, R. Hager, S. Shultz, Social stability in semiferal ponies:  
networks show interannual stability alongside seasonal flexibility. *Anim. Behav.* **136**, 175–  
520 184 (2018).

- 522 31. L. J. N. Brent, Friends of friends: are indirect connections in social networks important to  
animal behaviour? *Anim. Behav.* **103**, 211–222 (2015).
- 524 32. A.-L. Barabási, R. Albert, Emergence of scaling in random networks. *Science* **286**, 509–512  
(1999).
- 526 33. B. McCowan, *et al.*, Network stability Is a balancing act of personality, power, and conflict  
dynamics in rhesus macaque societies. *PLOS ONE* **6**, e22350 (2011).
- 528 34. A. M. Bell, S. J. Hankison, K. L. Laskowski, The repeatability of behaviour: a meta-analysis.  
*Anim. Behav.* **77**, 771–783 (2009).
- 530 35. D. P. Croft, *et al.*, Social structure and co-operative interactions in a wild population of  
guppies (*Poecilia reticulata*). *Behav. Ecol. Sociobiol.* **59**, 644–650 (2006).
- 532 36. J. N. Pruitt, D. I. Bolnick, A. Sih, N. DiRienzo, N. Pinter-Wollman, Behavioural  
hypervolumes of spider communities predict community performance and disbandment.  
*Proc. R. Soc. B Biol. Sci.* **283**, 20161409 (2016).
- 534 37. M. Perc, A. Szolnoki, Social diversity and promotion of cooperation in the spatial prisoner's  
dilemma game. *Phys. Rev. E* **77**, 011904 (2008).
- 536 38. F. C. Santos, F. L. Pinheiro, T. Lenaerts, J. M. Pacheco, The role of diversity in the evolution  
of cooperation. *J. Theor. Biol.* **299**, 88–96 (2012).
- 538 39. T. B. Ryder, R. Dakin, B. J. Vernasco, B. M. Horton, I. T. Moore, Testosterone modulates  
status-specific patterns of cooperation in a social network. Preprint.  
540 <https://doi.org/10.1101/453548>. *Am. Nat.* (in press)  
<https://doi.org/https://doi.org/10.1101/453548>.
- 542 40. T. Gross, L. Rudolf, S. A. Levin, U. Dieckmann, Generalized models reveal stabilizing  
factors in food webs. *Science* **325**, 747–750 (2009).
- 544 41. J. Gao, B. Barzel, A.-L. Barabási, Universal resilience patterns in complex networks. *Nature*  
**530**, 307–312 (2016).
- 546 42. A. Sih, A. Bell, J. C. Johnson, Behavioral syndromes: an ecological and evolutionary  
overview. *Trends Ecol. Evol.* **19**, 372–378 (2004).
- 548 43. U. Oberst, E. Wegmann, B. Stodt, M. Brand, A. Chamarro, Negative consequences from  
heavy social networking in adolescents: The mediating role of fear of missing out. *J.*  
550 *Adolesc.* **55**, 51–60 (2017).
44. J. Hoglund, R. V. Alatalo, *Leks* (Princeton University Press, 1995).
- 552 45. R Core Team, *R 3.5.1: A Language and Environment for Statistical Computing* (R  
Foundation for Statistical Computing, 2018).

- 554 46. M. Heindl, Social organization on leks of the wire-tailed manakin in southern venezuela. *The*  
*Condor* **104**, 772–779 (2002).
- 556 47. P. Pons, M. Latapy, Computing communities in large networks using random walks. **10**,  
191–218 (2006).
- 558 48. G. Csardi, coauthors, *igraph 1.2.2: network analysis and visualization*. (2018).
- 560 49. T. Poisot, E. Canard, D. Mouillot, N. Mouquet, D. Gravel, The dissimilarity of species  
interaction networks. *Ecol. Lett.* **15**, 1353–1361 (2012).
- 562 50. D. R. Farine, R. Freckleton, S. Rands, A guide to null models for animal social network  
analysis. *Methods Ecol. Evol.* **8**, 1309–1320 (2017).
51. D. Bates, *et al.*, *lme4 1.1-17: linear mixed-effects models using “Eigen” and S4* (2018).
- 564 52. D. Shizuka, D. B. McDonald, The network motif architecture of dominance hierarchies. *J. R.*  
*Soc. Interface* **12**, 20150080 (2015).
- 566 53. E. Thébault, C. Fontaine, Stability of ecological communities and the architecture of  
mutualistic and trophic networks. *Science* **329**, 853–856 (2010).
- 568 54. S. Nakagawa, H. Schielzeth, Repeatability for Gaussian and non-Gaussian data: a practical  
guide for biologists. *Biol. Rev.* **85**, 935–956 (2010).
- 570 55. P.-C. Buerkner, *brms 2.5.0: Bayesian regression models using Stan* (2018).
- 572 56. P.-C. Buerkner, brms: an R package for Bayesian multilevel models Using Stan. *J. Stat.*  
*Softw.* **80** (2017).
- 574 57. W. J. Browne, H. Goldstein, J. Rasbash, Multiple membership multiple classification  
(MMMC) models. *Stat. Model.* **1**, 103–124 (2001).
- 576 58. A. J. van Noordwijk, G. de Jong, Acquisition and allocation of resources: Their influence on  
variation in life history tactics. *Am. Nat.* **128**, 137–142 (1986).
- 578 59. M. van de Pol, J. Wright, A simple method for distinguishing within- versus between-subject  
effects using mixed models. *Anim. Behav.* **77**, 753–758 (2009).

580

## FIGURE LEGENDS

582

**Fig. 1. The temporal stability of social networks.** The examples in (A) illustrate the definition of network stability. Two initial manakin social networks are shown (blue and green), with individuals depicted as nodes, and edge thickness weighted by the interaction frequency on a log scale. When the same two networks were sampled a second time, the edge structure of the blue network remained mostly stable, whereas the structure of the green network had largely changed. Manakin social networks were more stable than expected by chance, as shown by the fact that nearly all of the observed stabilities in the grey distribution exceed the 95% confidence interval of the null expectation (vertical black bar). The observed networks also varied in properties such as: (B) the number of individuals in the social network (size), (C) the proportion of possible relationships that occurred (density, a measure of connectivity), and (D) the average frequency of interactions (weight). In the illustration for network weight, edge thicknesses are also scaled to the average interaction frequency. (E-F) Scaling of density and weight with network size. (G) Repeatability of network properties  $\pm$  95% confidence intervals ( $n = 86$  repeated measures, 60 for stability, of 11 lek networks).

**Fig. 2. A model of reciprocity and behavioral heterogeneity predicts network stability.** (A-B), The stability of a social network is positively associated with the average frequency of interactions (weight), whereas stability is negatively associated with the relative density of network connections. These effects were confirmed in an individual-based simulation of reciprocity that combined three behavioral rules: (i) a requirement for reciprocal partner choice, (ii) a preference for previous partners, and (iii) repeatable variation among individuals in social behavior. The left columns in A and B show partial residual scatterplots from the statistical analyses, after accounting for additional covariates (Tables S1-S3;  $n = 60$  for the observed networks and  $n = 3,000$  for the simulations). Because the simulation sample sizes are so large, shading is used on the simulation scatterplots to show the 95% central range of data binned along the x-axis instead of plotting individual points. The right columns in A and B show the standardized effect sizes ( $\pm$  95% confidence intervals for the observed networks; these intervals are also extended with shading for direct comparison with the simulations). The coefficients derived from the individual-based model fall within the 95% confidence intervals of the observed data, unlike the null model (which was a simulation with rules i-iii removed). Note that the 95% confidence intervals for all simulation effect sizes are not shown because they are narrower than the data points.

**Fig. 3. Social structure predicts the long-term persistence of social partnerships.** (A-B) The probability that a partnership persisted across years was greater when the two partners interacted at a higher frequency (edge weight), but had fewer alternate paths connecting them in the social network (edge connectivity). Data points show how edge weight and connectivity (x-axes) determine the predicted probability of partnership persistence (y-axis) in a multiple-membership analysis ( $n = 669$  partnerships among 91 individuals). (C-D) The influence of edge weight and connectivity is also found in the individual-based model of reciprocity described in Fig. 2. Shaded areas in C-D show the 95% central range for partial residuals binned along the x-axis.

624

**Fig. 4. Behavioral heterogeneity and social stability.** (A) The males who consistently interacted with more partners per day (high average daily degree, x-axis) promoted long-term

626



628 coalition persistence (y-axis;  $n = 90$  individuals;  $\pm 95\%$  confidence interval of the prediction  
630 line). (B-C) However, a trade-off is revealed when examining repeated measures within-  
632 individuals. The plots in B and C show an analysis of within-season partnership maintenance ( $n$   
634 = 565 repeated measures of 152 individuals). Despite the positive among-individual effect shown  
636 in B, at times when a given male had more partners than his average in **c**, he was less able to  
638 maintain stable partnerships. To visualize among- and within-individual variation, a single  
average is plotted for each male in B ( $\pm$  SE if a male had  $>3$  measurements), whereas a separate  
linear fit is shown for individuals with  $>3$  measurements in C. (D) In a simulation model, social  
networks with greater among-individual behavioral heterogeneity ( $CV_{\text{degree}}$ ) were also more  
temporally stable. The y-axis shows partial residuals from an analysis that also accounts for the  
effects of network size, weight, and density ( $n = 3,000$ ). Shading indicates the 95% central range  
for partial residuals binned along the x-axis.

Figure 1

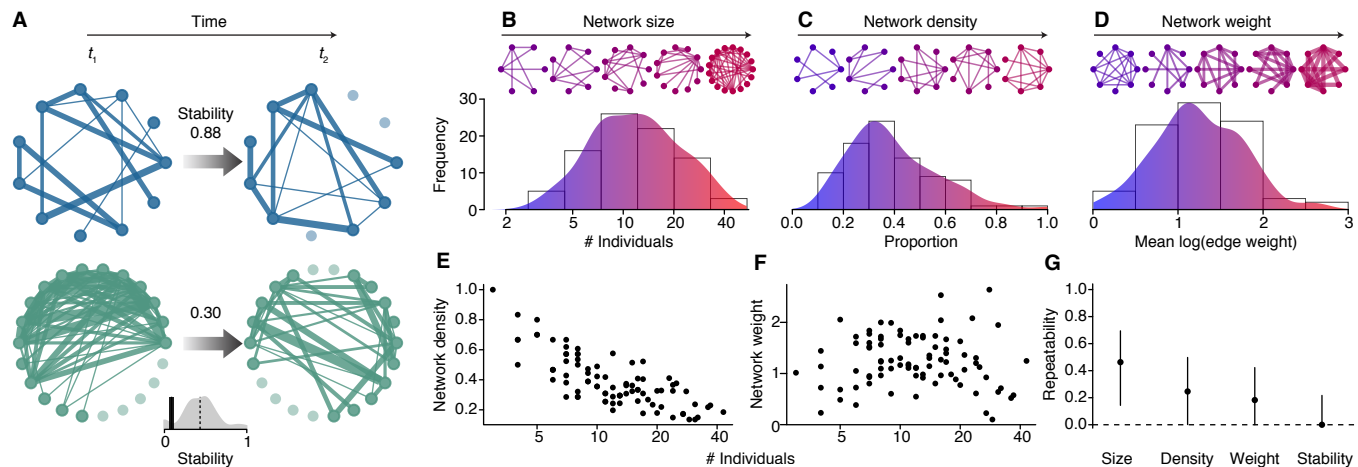

**Fig. 1. The temporal stability of social networks.** The examples in (A) illustrate the definition of network stability. Two initial manakin social networks are shown (blue and green), with individuals depicted as nodes, and edge thickness weighted by the interaction frequency on a log scale. When the same two networks were sampled a second time, the edge structure of the blue network remained mostly stable, whereas the structure of the green network had largely changed. Manakin social networks were more stable than expected by chance, as shown by the fact that nearly all of the observed stabilities in the grey distribution exceeded the 95% confidence interval of the null expectation (vertical black bar). The observed networks also varied in properties such as: (B) the number of individuals in the social network (size), (C) the proportion of possible relationships that occurred (density, a measure of connectivity), and (D) the average frequency of interactions (weight). In the illustration for network weight, edge thicknesses are also scaled to the average interaction frequency. (E-F) Scaling of density and weight with network size. (G) Repeatability of network properties  $\pm$  95% confidence intervals ( $n = 86$  repeated measures, 60 for stability, of 11 lek networks).

Figure 2

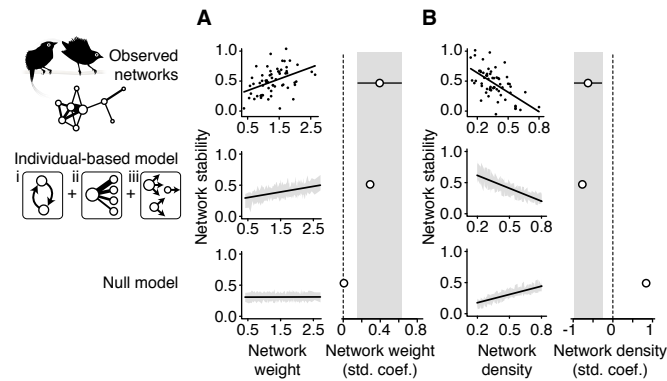

**Fig. 2. A model of reciprocity and behavioral heterogeneity predicts network stability.**

(A-B), The stability of a social network is positively associated with the average frequency of interactions (weight), whereas stability is negatively associated with the relative density of network connections. These effects were confirmed in an individual-based simulation of reciprocity that combined three behavioral rules: (i) a requirement for reciprocal partner choice, (ii) a preference for previous partners, and (iii) repeatable variation among individuals in social behavior. The left columns in A and B show partial residual scatterplots from the statistical analyses, after accounting for additional covariates (Tables S1-S3;  $n = 60$  for the observed networks and  $n = 3,000$  for the simulations). Because the simulation sample sizes are so large, shading is used on the simulation scatterplots to show the 95% central range of data binned along the x-axis instead of plotting individual points. The right columns in A and B show the standardized effect sizes ( $\pm$  95% confidence intervals for the observed networks; these intervals are also extended with shading for direct comparison with the simulations). The coefficients derived from the individual-based model fall within the 95% confidence intervals of the observed data, unlike the null model (which was a simulation with rules i-iii removed). Note that the 95% confidence intervals for all simulation effect sizes are not shown because they are narrower than the data points.

Figure 3

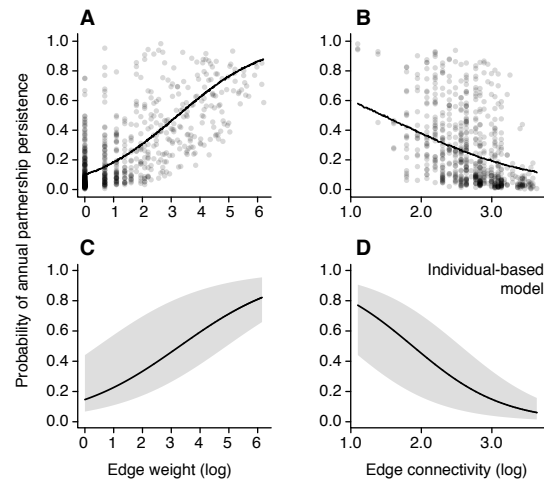

**Fig. 3. Social structure predicts the long-term persistence of social partnerships.** (A-B) The probability that a partnership persisted across years was greater when the two partners interacted at a higher frequency (edge weight), but had fewer alternate paths connecting them in the social network (edge connectivity). Data points show how edge weight and connectivity (x-axes) determine the predicted probability of partnership persistence (y-axis) in a multiple-membership analysis ( $n = 669$  partnerships among 91 individuals). (C-D) The influence of edge weight and connectivity is also found in the individual-based model of reciprocity described in Fig. 2. Shaded areas in C-D show the 95% central range for partial residuals binned along the x-axis.

Figure 4

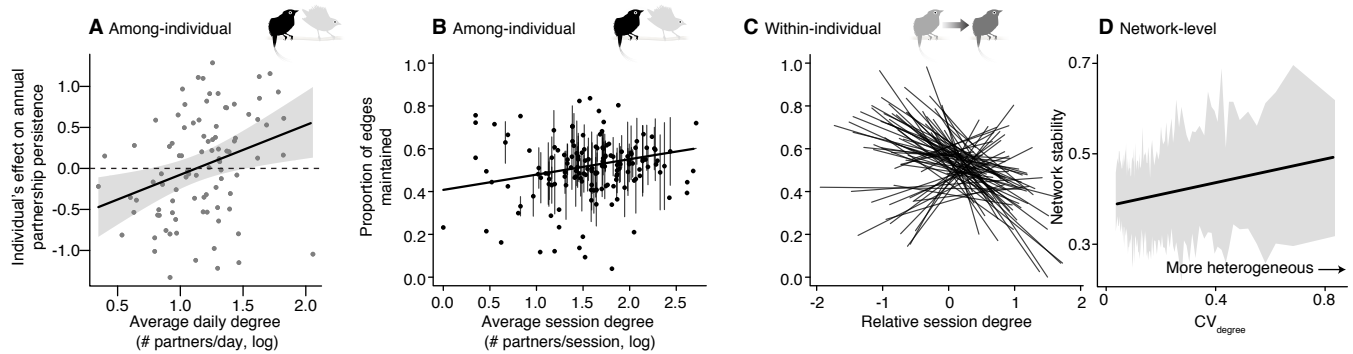

**Fig. 4. Behavioral heterogeneity and social stability.** (A) The males who consistently interacted with more partners per day (high average daily degree, x-axis) promoted long-term coalition persistence (y-axis;  $n = 90$  individuals;  $\pm 95\%$  confidence interval of the prediction line). (B-C) However, a trade-off is revealed when examining repeated measures within-individuals. The plots in B and C show an analysis of within-season partnership maintenance ( $n = 565$  repeated measures of 152 individuals). Despite the positive among-individual effect shown in B, at times when a given male had more partners than his average in c, he was less able to maintain stable partnerships. To visualize among- and within-individual variation, a single average is plotted for each male in B ( $\pm$  SE if a male had  $>3$  measurements), whereas a separate linear fit is shown for individuals with  $>3$  measurements in C. (D) In a simulation model, social networks with greater among-individual behavioral heterogeneity ( $CV_{\text{degree}}$ ) were also more temporally stable. The y-axis shows partial residuals from an analysis that also accounts for the effects of network size, weight, and density ( $n = 3,000$ ). Shading indicates the 95% central range for partial residuals binned along the x-axis.
